# Supplementary material for: methCancer-gen: a DNA methylome dataset generator for user-specified cancer type based on conditional variational autoencoder
Source: PubMed Central journal article supplement (PMC7216580; doi:10.1186/s12859-020-3516-8), 2020-05-11
Supplement: 12859_2020_3516_MOESM1_ESM.pdf [file 12859_2020_3516_MOESM1_ESM.pdf]

### Supplementary material S1.

(A) Average classification accuracy results for each cancer type based on different classifiers from the simulation performance evaluation in Figure 1.

| [methCancer-gen] | DT    | NB    | KNN   | RF    | SVM   |
|------------------|-------|-------|-------|-------|-------|
| <b>BLCA</b>      | 0.902 | 1.000 | 0.991 | 0.983 | 1.000 |
| <b>BRCA</b>      | 0.202 | 1.000 | 1.000 | 0.993 | 1.000 |
| <b>CESC</b>      | 0.040 | 0.000 | 0.970 | 0.665 | 1.000 |
| <b>COAD</b>      | 0.770 | 1.000 | 1.000 | 0.978 | 1.000 |
| <b>ESCA</b>      | 0.182 | 0.960 | 0.050 | 0.116 | 1.000 |
| <b>GBM</b>       | 0.569 | 0.980 | 0.895 | 0.798 | 1.000 |
| <b>HNSC</b>      | 0.821 | 1.000 | 1.000 | 0.996 | 1.000 |
| <b>KIRC</b>      | 0.938 | 1.000 | 1.000 | 1.000 | 1.000 |
| <b>KIRP</b>      | 0.853 | 0.999 | 1.000 | 0.975 | 1.000 |
| <b>LGG</b>       | 0.932 | 1.000 | 1.000 | 0.998 | 1.000 |
| <b>LIHC</b>      | 0.995 | 1.000 | 1.000 | 1.000 | 1.000 |
| <b>LUAD</b>      | 0.976 | 1.000 | 1.000 | 1.000 | 1.000 |
| <b>LUSC</b>      | 0.671 | 0.979 | 1.000 | 0.814 | 1.000 |
| <b>MESO</b>      | 0.785 | 0.663 | 0.788 | 0.893 | 1.000 |
| <b>PAAD</b>      | 0.844 | 0.959 | 1.000 | 0.930 | 1.000 |
| <b>PCPG</b>      | 0.973 | 0.990 | 1.000 | 1.000 | 1.000 |
| <b>PRAD</b>      | 0.940 | 1.000 | 1.000 | 1.000 | 1.000 |
| <b>READ</b>      | 0.334 | 0.083 | 0.000 | 0.246 | 0.332 |
| <b>SARC</b>      | 0.807 | 1.000 | 0.264 | 0.988 | 1.000 |
| <b>SKCM</b>      | 0.873 | 0.999 | 0.985 | 0.963 | 1.000 |
| <b>STAD</b>      | 0.713 | 0.999 | 1.000 | 0.969 | 1.000 |
| <b>TGCT</b>      | 0.429 | 0.999 | 1.000 | 0.688 | 1.000 |
| <b>THCA</b>      | 0.969 | 1.000 | 1.000 | 1.000 | 1.000 |
| <b>THYM</b>      | 0.658 | 0.709 | 1.000 | 0.846 | 1.000 |
| <b>UCEC</b>      | 0.133 | 0.000 | 1.000 | 0.912 | 1.000 |

**[Benchmark]**

|             | <b>DT</b> | <b>NB</b> | <b>KNN</b> | <b>RF</b> | <b>SVM</b> |
|-------------|-----------|-----------|------------|-----------|------------|
| <b>BLCA</b> | 0.630     | 1.000     | 1.000      | 0.943     | 1.000      |
| <b>BRCA</b> | 0.166     | 1.000     | 1.000      | 0.907     | 1.000      |
| <b>CESC</b> | 0.051     | 0.000     | 0.999      | 0.602     | 1.000      |
| <b>COAD</b> | 0.581     | 1.000     | 1.000      | 0.771     | 1.000      |
| <b>ESCA</b> | 0.224     | 0.319     | 0.197      | 0.209     | 1.000      |
| <b>GBM</b>  | 0.467     | 0.626     | 0.900      | 0.689     | 1.000      |
| <b>HNSC</b> | 0.617     | 1.000     | 1.000      | 0.833     | 1.000      |
| <b>KIRC</b> | 0.780     | 1.000     | 1.000      | 0.980     | 1.000      |
| <b>KIRP</b> | 0.651     | 1.000     | 1.000      | 0.879     | 1.000      |
| <b>LGG</b>  | 0.856     | 1.000     | 1.000      | 0.992     | 1.000      |
| <b>LIHC</b> | 0.944     | 1.000     | 1.000      | 1.000     | 1.000      |
| <b>LUAD</b> | 0.865     | 1.000     | 1.000      | 1.000     | 1.000      |
| <b>LUSC</b> | 0.529     | 0.913     | 1.000      | 0.590     | 1.000      |
| <b>MESO</b> | 0.647     | 0.139     | 0.800      | 0.765     | 1.000      |
| <b>PAAD</b> | 0.683     | 0.640     | 1.000      | 0.773     | 1.000      |
| <b>PCPG</b> | 0.893     | 1.000     | 1.000      | 0.967     | 1.000      |
| <b>PRAD</b> | 0.977     | 1.000     | 1.000      | 1.000     | 1.000      |
| <b>READ</b> | 0.387     | 0.000     | 0.000      | 0.384     | 0.312      |
| <b>SARC</b> | 0.640     | 1.000     | 0.182      | 0.780     | 1.000      |
| <b>SKCM</b> | 0.718     | 0.906     | 1.000      | 0.864     | 1.000      |
| <b>STAD</b> | 0.471     | 1.000     | 1.000      | 0.699     | 1.000      |
| <b>TGCT</b> | 0.405     | 1.000     | 1.000      | 0.615     | 1.000      |
| <b>THCA</b> | 0.962     | 1.000     | 1.000      | 0.999     | 1.000      |
| <b>THYM</b> | 0.624     | 0.786     | 1.000      | 0.819     | 1.000      |
| <b>UCEC</b> | 0.119     | 0.000     | 1.000      | 0.856     | 1.000      |

(B) False positive rate (FPR) of methCancer-gen for each cancer type from the simulation performance evaluation in Figure 1. To measure the FPR, multi-class datasets are converted to binary classification problems by using one class v.s. others scheme.

|                | <b>DT</b> | <b>NB</b> | <b>KNN</b> | <b>RF</b> | <b>SVM</b> |
|----------------|-----------|-----------|------------|-----------|------------|
| <b>BLCA</b>    | 0.027     | 0.026     | 0.001      | 0.015     | 0.000      |
| <b>BRCA</b>    | 0.027     | 0.009     | 0.000      | 0.008     | 0.000      |
| <b>CESC</b>    | 0.005     | 0.000     | 0.000      | 0.001     | 0.000      |
| <b>COAD</b>    | 0.026     | 0.038     | 0.042      | 0.030     | 0.030      |
| <b>ESCA</b>    | 0.023     | 0.005     | 0.000      | 0.004     | 0.000      |
| <b>GBM</b>     | 0.008     | 0.000     | 0.000      | 0.000     | 0.000      |
| <b>HNSC</b>    | 0.040     | 0.036     | 0.034      | 0.032     | 0.000      |
| <b>KIRC</b>    | 0.011     | 0.000     | 0.000      | 0.003     | 0.000      |
| <b>KIRP</b>    | 0.006     | 0.000     | 0.000      | 0.001     | 0.000      |
| <b>LGG</b>     | 0.017     | 0.001     | 0.004      | 0.009     | 0.000      |
| <b>LIHC</b>    | 0.003     | 0.000     | 0.000      | 0.001     | 0.000      |
| <b>LUAD</b>    | 0.003     | 0.000     | 0.012      | 0.000     | 0.000      |
| <b>LUSC</b>    | 0.037     | 0.025     | 0.003      | 0.010     | 0.000      |
| <b>MESO</b>    | 0.009     | 0.000     | 0.000      | 0.001     | 0.000      |
| <b>PAAD</b>    | 0.017     | 0.000     | 0.026      | 0.001     | 0.000      |
| <b>PCPG</b>    | 0.004     | 0.000     | 0.000      | 0.001     | 0.000      |
| <b>PRAD</b>    | 0.003     | 0.000     | 0.000      | 0.001     | 0.000      |
| <b>READ</b>    | 0.005     | 0.000     | 0.000      | 0.000     | 0.000      |
| <b>SARC</b>    | 0.011     | 0.007     | 0.000      | 0.003     | 0.000      |
| <b>SKCM</b>    | 0.003     | 0.000     | 0.000      | 0.000     | 0.000      |
| <b>STAD</b>    | 0.019     | 0.007     | 0.005      | 0.014     | 0.000      |
| <b>TGCT</b>    | 0.003     | 0.000     | 0.000      | 0.000     | 0.000      |
| <b>THCA</b>    | 0.005     | 0.000     | 0.000      | 0.000     | 0.000      |
| <b>THYM</b>    | 0.002     | 0.000     | 0.000      | 0.000     | 0.000      |
| <b>UCEC</b>    | 0.009     | 0.000     | 0.000      | 0.001     | 0.000      |
| <b>Average</b> | 0.013     | 0.006     | 0.005      | 0.005     | 0.001      |

(C) False negative rate (FNR) of methCancer-gen for each cancer type from the simulation performance evaluation in Figure 1. To measure the FNR, multi-class datasets are converted to binary classification problems by using one class v.s. others scheme.

|                | <b>DT</b> | <b>NB</b> | <b>KNN</b> | <b>RF</b> | <b>SVM</b> |
|----------------|-----------|-----------|------------|-----------|------------|
| <b>BLCA</b>    | 0.098     | 0.000     | 0.009      | 0.017     | 0.000      |
| <b>BRCA</b>    | 0.798     | 0.000     | 0.000      | 0.007     | 0.000      |
| <b>CEC</b>     | 0.960     | 1.000     | 0.030      | 0.335     | 0.000      |
| <b>COAD</b>    | 0.230     | 0.000     | 0.000      | 0.022     | 0.000      |
| <b>ESCA</b>    | 0.818     | 0.040     | 0.950      | 0.884     | 0.000      |
| <b>GBM</b>     | 0.431     | 0.020     | 0.105      | 0.202     | 0.000      |
| <b>HNSC</b>    | 0.179     | 0.000     | 0.000      | 0.004     | 0.000      |
| <b>KIRC</b>    | 0.062     | 0.000     | 0.000      | 0.000     | 0.000      |
| <b>KIRP</b>    | 0.147     | 0.001     | 0.000      | 0.025     | 0.000      |
| <b>LGG</b>     | 0.068     | 0.000     | 0.000      | 0.002     | 0.000      |
| <b>LIHC</b>    | 0.005     | 0.000     | 0.000      | 0.000     | 0.000      |
| <b>LUAD</b>    | 0.024     | 0.000     | 0.000      | 0.000     | 0.000      |
| <b>LUSC</b>    | 0.329     | 0.021     | 0.000      | 0.186     | 0.000      |
| <b>MESO</b>    | 0.215     | 0.337     | 0.212      | 0.107     | 0.000      |
| <b>PAAD</b>    | 0.156     | 0.041     | 0.000      | 0.070     | 0.000      |
| <b>PCPG</b>    | 0.027     | 0.010     | 0.000      | 0.000     | 0.000      |
| <b>PRAD</b>    | 0.060     | 0.000     | 0.000      | 0.000     | 0.000      |
| <b>READ</b>    | 0.666     | 0.917     | 1.000      | 0.754     | 0.730      |
| <b>SARC</b>    | 0.193     | 0.000     | 0.736      | 0.012     | 0.000      |
| <b>SKCM</b>    | 0.127     | 0.001     | 0.015      | 0.037     | 0.000      |
| <b>STAD</b>    | 0.287     | 0.001     | 0.000      | 0.031     | 0.000      |
| <b>TGCT</b>    | 0.571     | 0.001     | 0.000      | 0.312     | 0.000      |
| <b>THCA</b>    | 0.031     | 0.000     | 0.000      | 0.000     | 0.000      |
| <b>THYM</b>    | 0.342     | 0.291     | 0.000      | 0.154     | 0.000      |
| <b>UCEC</b>    | 0.867     | 1.000     | 0.000      | 0.088     | 0.000      |
| <b>Average</b> | 0.308     | 0.147     | 0.122      | 0.130     | 0.029      |
