# Supplementary material for: methCancer-gen: a DNA methylome dataset generator for user-specified cancer type based on conditional variational autoencoder
Source: PubMed Central journal article supplement (PMC7216580; doi:10.1186/s12859-020-3516-8), 2020-05-11
Supplement: 12859_2020_3516_MOESM2_ESM.pdf [file 12859_2020_3516_MOESM2_ESM.pdf]

## Supplementary material S2.

Average AUC results for each cancer type from the performance evaluation in Figure 1.

To measure the AUC, multi-class datasets are converted to binary classification problems by using one class v.s. others scheme.

[methCancer-gen]

|                | DT    | NB    | KNN   | RF    | SVM   |
|----------------|-------|-------|-------|-------|-------|
| <b>BLCA</b>    | 0.937 | 0.987 | 1.000 | 0.984 | 1.000 |
| <b>BRCA</b>    | 0.588 | 0.996 | 1.000 | 0.992 | 1.000 |
| <b>CESC</b>    | 0.518 | 0.500 | 0.985 | 0.832 | 1.000 |
| <b>COAD</b>    | 0.872 | 0.981 | 0.979 | 0.974 | 0.986 |
| <b>ESCA</b>    | 0.579 | 0.977 | 0.599 | 0.556 | 1.000 |
| <b>GBM</b>     | 0.780 | 0.990 | 0.948 | 0.899 | 1.000 |
| <b>HNSC</b>    | 0.890 | 0.982 | 0.983 | 0.982 | 1.000 |
| <b>KIRC</b>    | 0.964 | 1.000 | 1.000 | 0.999 | 1.000 |
| <b>KIRP</b>    | 0.924 | 1.000 | 1.000 | 0.987 | 1.000 |
| <b>LGG</b>     | 0.958 | 1.000 | 0.999 | 0.995 | 1.000 |
| <b>LIHC</b>    | 0.996 | 1.000 | 1.000 | 1.000 | 1.000 |
| <b>LUAD</b>    | 0.987 | 1.000 | 0.994 | 1.000 | 1.000 |
| <b>LUSC</b>    | 0.817 | 0.977 | 0.999 | 0.902 | 1.000 |
| <b>MESO</b>    | 0.888 | 0.832 | 0.894 | 0.946 | 1.000 |
| <b>PAAD</b>    | 0.914 | 0.980 | 0.987 | 0.964 | 1.000 |
| <b>PCPG</b>    | 0.984 | 0.995 | 1.000 | 1.000 | 1.000 |
| <b>PRAD</b>    | 0.968 | 1.000 | 1.000 | 1.000 | 1.000 |
| <b>READ</b>    | 0.665 | 0.542 | 0.500 | 0.623 | 0.656 |
| <b>SARC</b>    | 0.898 | 0.997 | 0.632 | 0.993 | 1.000 |
| <b>SKCM</b>    | 0.935 | 1.000 | 0.993 | 0.981 | 1.000 |
| <b>STAD</b>    | 0.847 | 0.996 | 0.997 | 0.977 | 1.000 |
| <b>TGCT</b>    | 0.713 | 1.000 | 1.000 | 0.844 | 1.000 |
| <b>THCA</b>    | 0.982 | 1.000 | 1.000 | 1.000 | 1.000 |
| <b>THYM</b>    | 0.828 | 0.855 | 1.000 | 0.923 | 1.000 |
| <b>UCEC</b>    | 0.562 | 0.500 | 1.000 | 0.956 | 1.000 |
| <b>Average</b> | 0.840 | 0.923 | 0.940 | 0.932 | 0.986 |

**[Benchmark]**

|                | <b>DT</b> | <b>NB</b> | <b>KNN</b> | <b>RF</b> | <b>SVM</b> |
|----------------|-----------|-----------|------------|-----------|------------|
| <b>BLCA</b>    | 0.798     | 0.992     | 1.000      | 0.955     | 1.000      |
| <b>BRCA</b>    | 0.566     | 0.991     | 1.000      | 0.946     | 1.000      |
| <b>CESC</b>    | 0.520     | 0.500     | 1.000      | 0.799     | 1.000      |
| <b>COAD</b>    | 0.776     | 0.979     | 0.979      | 0.871     | 0.985      |
| <b>ESCA</b>    | 0.595     | 0.657     | 0.599      | 0.597     | 1.000      |
| <b>GBM</b>     | 0.726     | 0.813     | 0.950      | 0.844     | 1.000      |
| <b>HNSC</b>    | 0.793     | 0.998     | 0.994      | 0.905     | 1.000      |
| <b>KIRC</b>    | 0.880     | 1.000     | 1.000      | 0.986     | 1.000      |
| <b>KIRP</b>    | 0.820     | 1.000     | 1.000      | 0.938     | 1.000      |
| <b>LGG</b>     | 0.920     | 0.992     | 0.998      | 0.989     | 1.000      |
| <b>LIHC</b>    | 0.968     | 1.000     | 1.000      | 0.999     | 1.000      |
| <b>LUAD</b>    | 0.929     | 0.996     | 0.989      | 1.000     | 1.000      |
| <b>LUSC</b>    | 0.744     | 0.952     | 0.998      | 0.787     | 1.000      |
| <b>MESO</b>    | 0.819     | 0.570     | 0.900      | 0.881     | 1.000      |
| <b>PAAD</b>    | 0.832     | 0.820     | 0.993      | 0.885     | 1.000      |
| <b>PCPG</b>    | 0.943     | 1.000     | 1.000      | 0.982     | 1.000      |
| <b>PRAD</b>    | 0.985     | 1.000     | 1.000      | 0.999     | 1.000      |
| <b>READ</b>    | 0.688     | 0.500     | 0.500      | 0.688     | 0.635      |
| <b>SARC</b>    | 0.813     | 0.985     | 0.591      | 0.886     | 1.000      |
| <b>SKCM</b>    | 0.856     | 0.953     | 1.000      | 0.932     | 1.000      |
| <b>STAD</b>    | 0.722     | 0.956     | 0.987      | 0.842     | 1.000      |
| <b>TGCT</b>    | 0.699     | 1.000     | 1.000      | 0.807     | 1.000      |
| <b>THCA</b>    | 0.977     | 1.000     | 1.000      | 0.999     | 1.000      |
| <b>THYM</b>    | 0.809     | 0.893     | 1.000      | 0.909     | 1.000      |
| <b>UCEC</b>    | 0.556     | 0.500     | 1.000      | 0.927     | 1.000      |
| <b>Average</b> | 0.789     | 0.882     | 0.939      | 0.894     | 0.985      |
