# Supplementary material for: methCancer-gen: a DNA methylome dataset generator for user-specified cancer type based on conditional variational autoencoder
Source: PubMed Central journal article supplement (PMC7216580; doi:10.1186/s12859-020-3516-8), 2020-05-11
Supplement: 12859_2020_3516_MOESM3_ESM.pdf [file 12859_2020_3516_MOESM3_ESM.pdf]

### Supplementary material S3.

Average AUC results of the SVM classifier for each cancer type from the second experiment (Table 4) to validate whether training a classifier based on a combined dataset with the original TCGA data and the generated data from methCancer-gen could improve the classification performance. Each experiment was repeated five times.

| Cancer         | TCGA only | TCGA & benchmark                                 |       |       | TCGA & methCancer-gen |       |       |
|----------------|-----------|--------------------------------------------------|-------|-------|-----------------------|-------|-------|
|                |           | Number of generated dataset for each cancer type |       |       |                       |       |       |
|                |           | 100                                              | 200   | 300   | 100                   | 200   | 300   |
| <b>BLCA</b>    | 0.891     | 0.894                                            | 0.894 | 0.894 | 0.895                 | 0.897 | 0.903 |
| <b>COAD</b>    | 0.959     | 0.959                                            | 0.959 | 0.959 | 0.964                 | 0.974 | 0.974 |
| <b>GBM</b>     | 0.986     | 0.986                                            | 0.986 | 0.986 | 0.986                 | 0.986 | 0.986 |
| <b>KIRC</b>    | 0.866     | 0.867                                            | 0.867 | 0.867 | 0.867                 | 0.867 | 0.867 |
| <b>LUAD</b>    | 0.854     | 0.873                                            | 0.873 | 0.873 | 0.896                 | 0.900 | 0.902 |
| <b>PAAD</b>    | 0.560     | 0.575                                            | 0.575 | 0.578 | 0.690                 | 0.708 | 0.712 |
| <b>PRAD</b>    | 0.850     | 0.850                                            | 0.850 | 0.850 | 0.850                 | 0.850 | 1.000 |
| <b>SKCM</b>    | 0.943     | 0.943                                            | 0.943 | 0.943 | 0.943                 | 0.943 | 0.965 |
| <b>Average</b> | 0.864     | 0.868                                            | 0.868 | 0.869 | 0.886                 | 0.891 | 0.914 |
