# Supplementary material for: methCancer-gen: a DNA methylome dataset generator for user-specified cancer type based on conditional variational autoencoder
Source: PubMed Central journal article supplement (PMC7216580; doi:10.1186/s12859-020-3516-8), 2020-05-11

## Supplementary material S4.

t-SNE visualization of the original dataset and simulation dataset from methCancer-gen and the benchmark method is shown.

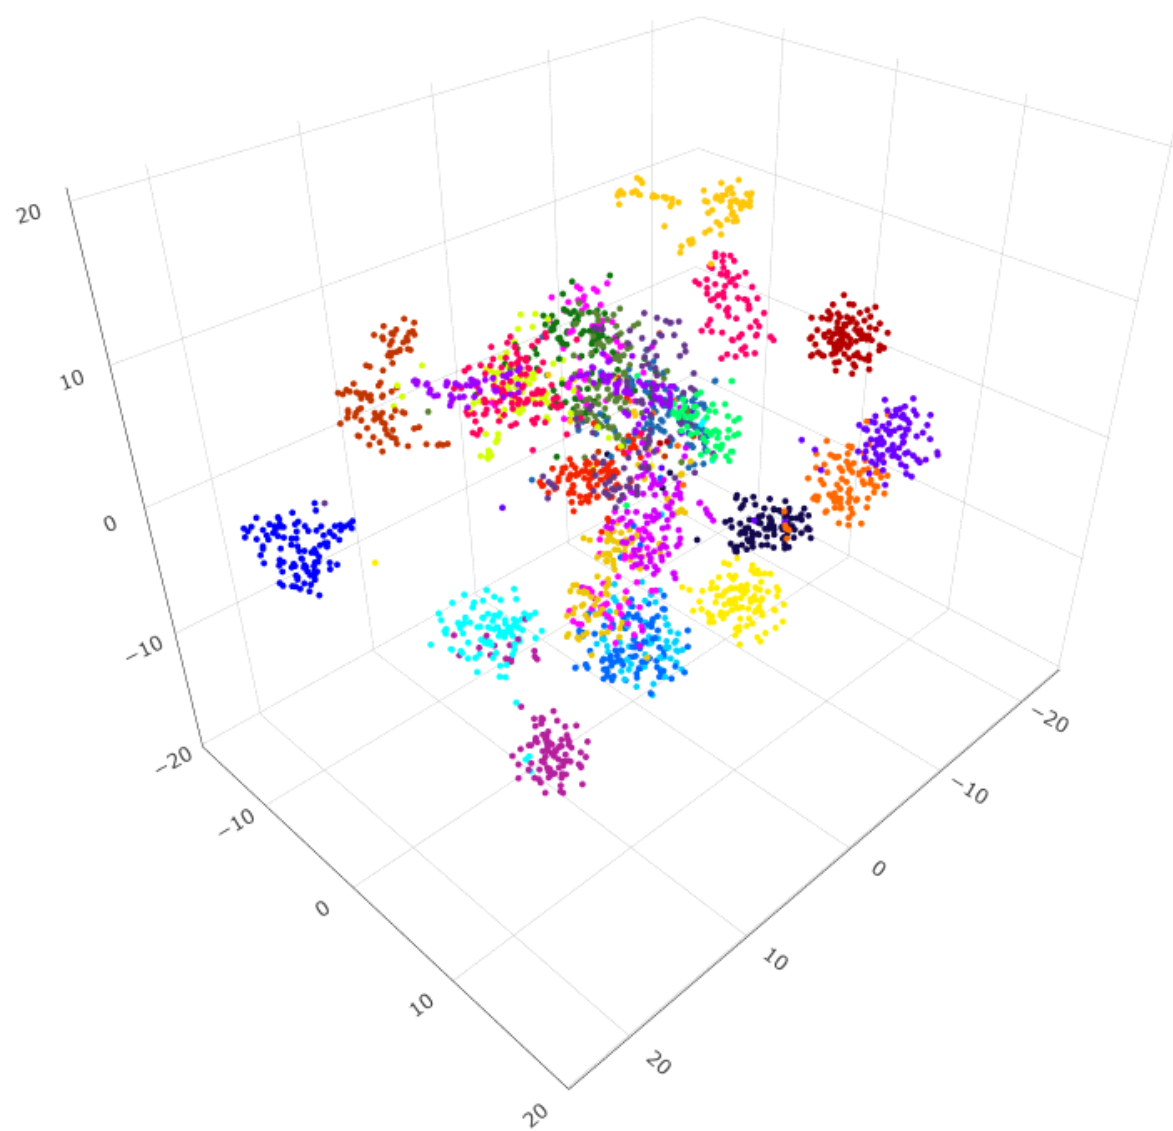

**Original dataset**

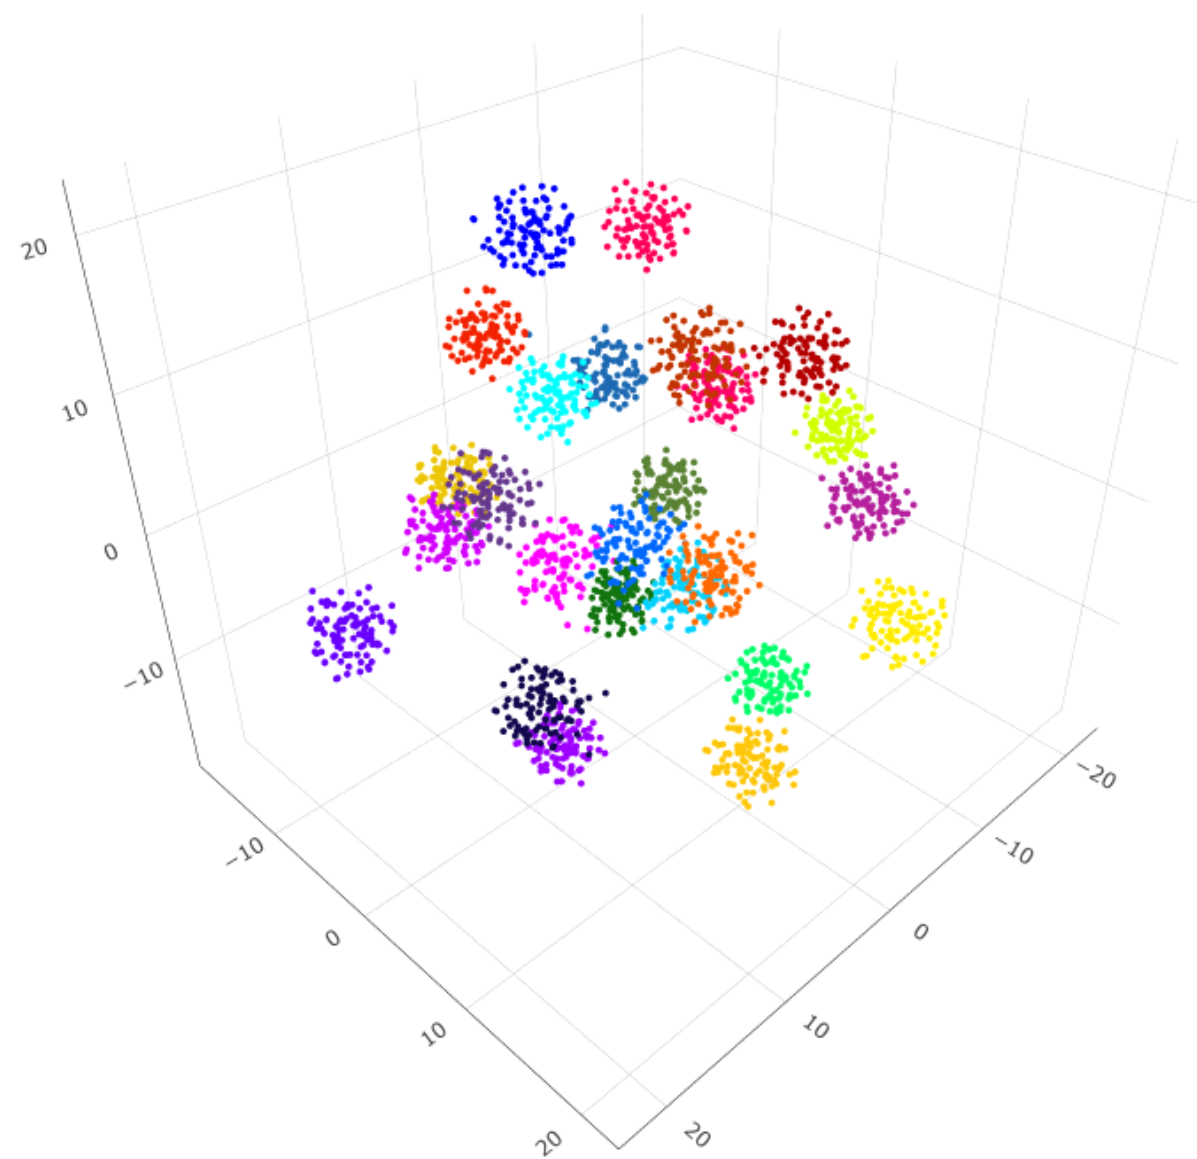

**Simulation dataset  
from methCancer-gen**

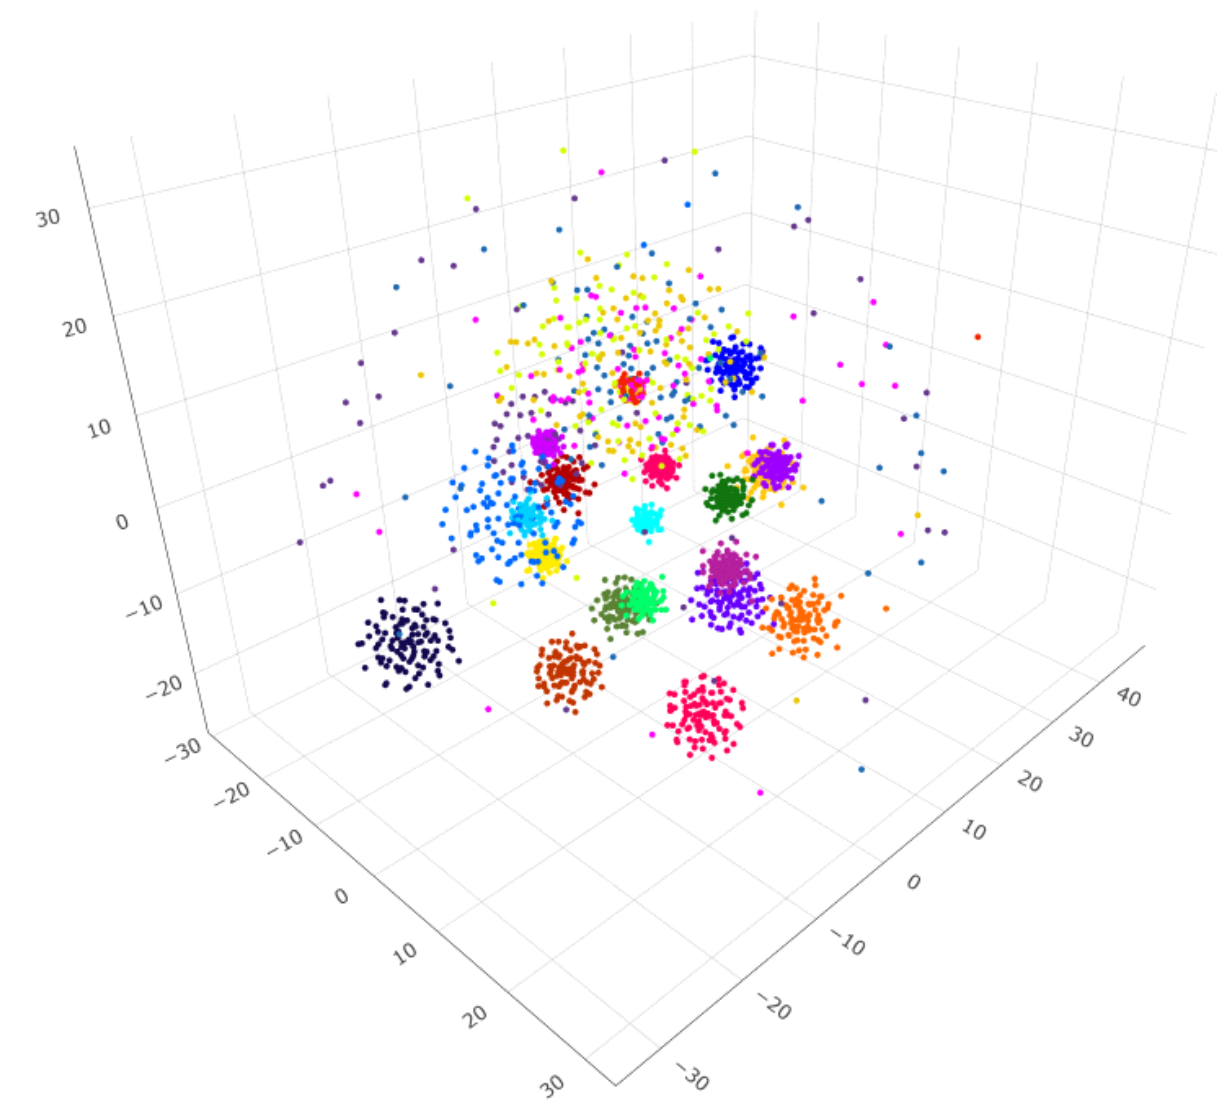

**Simulation dataset  
from benchmark**

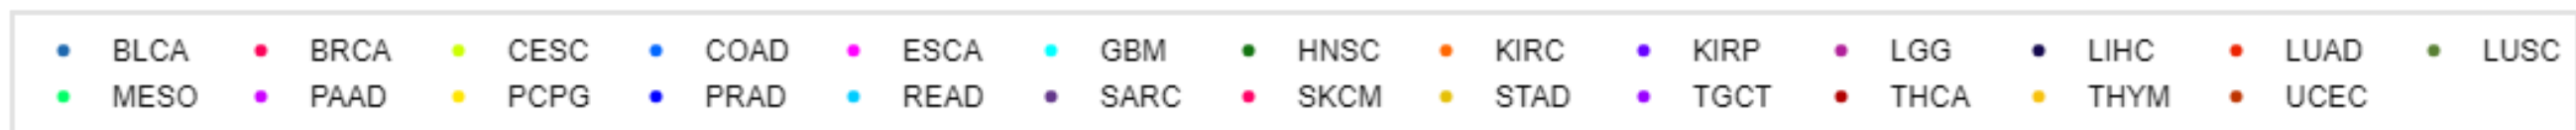

Supplement: 12859_2020_3516_MOESM4_ESM.pdf [file 12859_2020_3516_MOESM4_ESM.pdf]
