# Supplementary material for: methCancer-gen: a DNA methylome dataset generator for user-specified cancer type based on conditional variational autoencoder
Source: PubMed Central journal article supplement (PMC7216580; doi:10.1186/s12859-020-3516-8), 2020-05-11
Supplement: 12859_2020_3516_MOESM5_ESM.pdf [file 12859_2020_3516_MOESM5_ESM.pdf]

### Supplementary material S5.

Performance comparison of two SVM classifiers trained by median imputed dataset and imputed dataset using methCancer-gen generated data respectively. 100,000 missing values (NA) for the imputation test were randomly created within 30% samples of TCGA data.

| <b>Accuracy of SVM</b> | <b>median imputation</b> | <b>methCancer-gen</b> |
|------------------------|--------------------------|-----------------------|
| Test 1                 | 0.781                    | 0.805                 |
| Test 2                 | 0.780                    | 0.803                 |
| Test 3                 | 0.781                    | 0.807                 |
| Test 4                 | 0.779                    | 0.805                 |
| Test 5                 | 0.780                    | 0.803                 |
| <b>Average</b>         | 0.781                    | <b>0.805</b>          |
